# Supplementary material
Source: PubMed Central journal article supplement (PMC3711520)
Supplement: NIHMS427470-supplement-Susan_Wu_Supplementary.pdf [file NIHMS427470-supplement-Susan_Wu_Supplementary.pdf]

Supplementary information S1 (table) | Evidence for and against DNA demethylation in mammalian cells

| Enzyme                            | Evidence supporting demethylation                                                                                                                                                                       | Evidence against demethylation                                                                                                       |
|-----------------------------------|---------------------------------------------------------------------------------------------------------------------------------------------------------------------------------------------------------|--------------------------------------------------------------------------------------------------------------------------------------|
| <b>Direct removal</b>             |                                                                                                                                                                                                         |                                                                                                                                      |
| MBD2                              | - <i>In vitro</i> assays (1)                                                                                                                                                                            | - Stably binds to methylated DNA (2,3)<br>- Normal methylation patterns in null mice (4)                                             |
| <b>5meC glycosylases</b>          |                                                                                                                                                                                                         |                                                                                                                                      |
| DME<br>ROS1/DML1<br>DML2<br>DML3  | - <i>In vitro</i> assays (5–9)<br>- Loss of function mutants exhibit expression of imprinted genes and hypermethylation (5, 10)                                                                         |                                                                                                                                      |
| TDG                               |                                                                                                                                                                                                         | - Excision activity is much lower against 5meC compared to thymine (11)                                                              |
| MBD4                              |                                                                                                                                                                                                         | - Excision activity is much lower against 5meC compared to thymine (12)<br>- Null zygotes exhibit paternal genome demethylation (13) |
| <b>Deaminases</b>                 |                                                                                                                                                                                                         |                                                                                                                                      |
| AID<br>APOBEC1                    | - <i>In vitro</i> oligonucleotide and <i>E. coli</i> assay (14)<br>- Deamination and BER of methylated when expressed in zebrafish embryos (15)<br>- Subtle hypermethylation in AID-deficient PGCs (16) | - Knockout of AID or APOBEC1 are viable and fertile (18–21)<br>- Majority of demethylation is maintained in AID-deficient PGCs (16)  |
| Dnmt3a<br>Dnmt3b                  | - <i>In vitro</i> assays (17)                                                                                                                                                                           | - Deamination reaction can only occur in the absence of SAM (17)                                                                     |
| <b>Nucleotide excision repair</b> |                                                                                                                                                                                                         |                                                                                                                                      |
| Gadd45a                           | - Loci-specific and global demethylation after overexpression, hypermethylation after knockdown (22)<br>- Knockdown of NER machinery results in hypermethylation (23)                                   | - Lack of direct biochemical evidence<br>- Irreproducibility (25)<br>- No expected hypermethylation in knockout mouse (26)           |
| Gadd45b                           | - Deficiency results in promoter hypermethylation (24)                                                                                                                                                  | - Lack of direct biochemical evidence<br>- Null zygotes undergo paternal genome demethylation (27)                                   |
| <b>Oxidative demethylation</b>    |                                                                                                                                                                                                         |                                                                                                                                      |
| Tet1<br>Tet2<br>Tet3              | - <i>In vitro</i> assays (28, 29)<br>- 5hmC is present in ES cells and Purkinje neurons (28, 30)                                                                                                        |                                                                                                                                      |
| <b>Radical SAM</b>                |                                                                                                                                                                                                         |                                                                                                                                      |
| Elongator                         | - Paternal genome is not demethylated after knockdown in zygotes (27)                                                                                                                                   | - Lack of direct biochemical evidence                                                                                                |

1. Bhattacharya, S. K., Ramchandani, S., Cervoni, N. & Szyf, M. A mammalian protein with specific demethylase activity for mCpG DNA. *Nature* **397**, 579–583 (1999).
2. Ng, H. H. *et al.* MBD2 is a transcriptional repressor belonging to the MeCP1 histone deacetylase complex. *Nature Genet.* **23**, 58–61 (1999).
3. Hendrich, B. & Bird, A. Identification and characterization of a family of mammalian methyl-CpG binding proteins. *Mol. Cell. Biol.* **18**, 6538–6547 (1998).
4. Hendrich, B., Guy, J., Ramsahoye, B., Wilson, V. A. & Bird, A. Closely related proteins MBD2 and MBD3 play distinctive but interacting roles in mouse development. *Genes Dev.* **15**, 710–723 (2001).
5. Gong, Z. *et al.* ROS1, a repressor of transcriptional gene silencing in *Arabidopsis*, encodes a DNA glycosylase/lyase. *Cell* **111**, 803–814 (2002).
6. Agius, F., Kapoor, A. & Zhu, J. K. Role of the *Arabidopsis* DNA glycosylase/lyase ROS1 in active DNA demethylation. *Proc. Natl Acad. Sci. USA* **103**, 11796–11801 (2006).
7. Gehring, M. *et al.* DEMETER DNA glycosylase establishes *MEDEA* polycomb gene self-imprinting by allele-specific demethylation. *Cell* **124**, 495–506 (2006).
8. Morales-Ruiz, T. *et al.* DEMETER and REPRESSOR OF SILENCING 1 encode 5-methylcytosine DNA glycosylases. *Proc. Natl Acad. Sci. USA* **103**, 6853–6858 (2006).
9. Penterman, J. *et al.* DNA demethylation in the *Arabidopsis* genome. *Proc. Natl Acad. Sci. USA* **104**, 6752–6757 (2007).
10. Choi, Y. *et al.* DEMETER, a DNA glycosylase domain protein, is required for endosperm gene imprinting and seed viability in *Arabidopsis*. *Cell* **110**, 33–42 (2002).
11. Zhu, B. *et al.* 5-methylcytosine-DNA glycosylase activity is present in a cloned G/T mismatch DNA glycosylase associated with the chicken embryo DNA demethylation complex. *Proc. Natl Acad. Sci. USA* **97**, 5135–5139 (2000).
12. Zhu, B. *et al.* 5-Methylcytosine DNA glycosylase activity is also present in the human MBD4 (G/T mismatch glycosylase) and in a related avian sequence. *Nucleic Acids Res.* **28**, 4157–4165 (2000).
13. Hendrich, B., Hardeland, U., Ng, H. H., Jiricny, J. & Bird, A. The thymine glycosylase MBD4 can bind to the product of deamination at methylated CpG sites. *Nature* **401**, 301–304 (1999).
14. Morgan, H. D., Dean, W., Coker, H. A., Reik, W. & Petersen-Mahrt, S. K. Activation-induced cytidine deaminase deaminates 5-methylcytosine in DNA and is expressed in pluripotent tissues: implications for epigenetic reprogramming. *J. Biol. Chem.* **279**, 52353–52360 (2004).
15. Rai, K. *et al.* DNA demethylation in zebrafish involves the coupling of a deaminase, a glycosylase, and GADD45. *Cell* **135**, 1201–1212 (2008).
16. Popp, C. *et al.* Genome-wide erasure of DNA methylation in mouse primordial germ cells is affected by AID deficiency. *Nature* **463**, 1101–1105 (2010).
17. Metivier, R. *et al.* Cyclical DNA methylation of a transcriptionally active promoter. *Nature* **452**, 45–50 (2008).
18. Muramatsu, M. *et al.* Class switch recombination and hypermutation require activation-induced cytidine deaminase (AID), a potential RNA editing enzyme. *Cell* **102**, 553–563 (2000).
19. Revy, P. *et al.* Activation-induced cytidine deaminase (AID) deficiency causes the autosomal recessive form of the Hyper-IgM syndrome (HIGM2). *Cell* **102**, 565–575 (2000).
20. Hirano, K. *et al.* Targeted disruption of the mouse apobec-1 gene abolishes apolipoprotein B mRNA editing and eliminates apolipoprotein B48. *J. Biol. Chem.* **271**, 9887–9890 (1996).
21. Morrison, J. R. *et al.* Apolipoprotein B RNA editing enzyme-deficient mice are viable despite alterations in lipoprotein metabolism. *Proc. Natl Acad. Sci. USA* **93**, 7154–7159 (1996).
22. Barreto, G. *et al.* Gadd45a promotes epigenetic gene activation by repair-mediated DNA demethylation. *Nature* **445**, 671–675 (2007).
23. Schmitz, K. M. *et al.* TAF12 recruits Gadd45a and the nucleotide excision repair complex to the promoter of rRNA genes leading to active DNA demethylation. *Mol. Cell* **33**, 344–353 (2009).
24. Ma, D. K. *et al.* Neuronal activity-induced Gadd45b promotes epigenetic DNA demethylation and adult neurogenesis. *Science* **323**, 1074–1077 (2009).
25. Jin, S. G., Guo, C. & Pfeifer, G. P. GADD45A does not promote DNA demethylation. *PLoS Genet.* **4**, e1000013 (2008).
26. Engel, N. *et al.* Conserved DNA methylation in Gadd45a<sup>-/-</sup> mice. *Epigenetics* **4**, 98–9 (2009).
27. Okada, Y., Yamagata, K., Hong, K., Wakayama, T. & Zhang, Y. A role for the elongator complex in zygotic paternal genome demethylation. *Nature* **463**, 554–558 (2010).
28. Tahiliani, M. *et al.* Conversion of 5-methylcytosine to 5-hydroxymethylcytosine in mammalian DNA by MLL partner TET1. *Science* **324**, 930–935 (2009).
29. Ito, S. *et al.* Role of Tet proteins in 5mC to 5hmC conversion, ES cell self-renewal, and ICM specification. *Nature* 18 Jul 2010 (doi:10.1038/nature09303).
30. Kriaucionis, S. & Heintz, N. The nuclear DNA base 5-hydroxymethylcytosine is present in Purkinje neurons and the brain. *Science* **324**, 929–930 (2009).
